# Supplementary material for: Gadoxetic acid-enhanced magnetic resonance imaging significantly influences the clinical course in patients with colorectal liver metastases
Source: BMC Med Imaging. 2018 Nov 15;18:44. doi: 10.1186/s12880-018-0289-x (PMC6238306; doi:10.1186/s12880-018-0289-x)
Supplement: Supplementary file 1 — MRI scan protocols 1.5 Tesla and 3 Tesla Ingenia. Both scanning protocols of 1.5 T and 3 T Ingenia are displayed in a table in the order of acquiring the sequences. (DOCX 20 kb) [file 12880_2018_289_MOESM1_ESM.docx]

**Additional file**

**Gadoxetic acid-enhanced magnetic resonance imaging significantly influences the clinical course in patients with colorectal liver metastases**

B.G. Sibinga Mulder1, B.S., K. Visser1, B.S., S. Feshtali2, MD, A.L. Vahrmeijer1, MD, PhD, R.J. Swijnenburg1, MD, PhD, H.H. Hartgrink1, MD, PhD, R. van den Boom2, MD, PhD, M.C. Burgmans2, MD, PhD, J.S.D. Mieog1, MD, PhD.

*1 Department of Surgery, Leiden University Medical Center, the Netherlands*

*2 Department of Radiology, Leiden University Medical Center, the Netherlands*

**MRI scan protocols 1.5 Tesla and 3 Tesla Ingenia**

Both scanning protocols of 1.5T and 3T Ingenia are displayed in a table in the order of acquiring the sequences. During all scans bolus tracking was used. The timing of the post-contrast sequences were 20s, 1 min, 2min and 20min after contrast administration. For hepatobiliary T1w sequence a flip angle of 10 degrees was used.

**1.5T:**

| **Name** | **Technique** | **Orientation** | **FOV** | **Slices** | **Thickness** | **Voxel size** | **Scan time** |
| --- | --- | --- | --- | --- | --- | --- | --- |
| SURVEY | T1FFE | MST |  |  |  |  | 0:15 |
| T2 TSE COR | TSE | COR | 350x330 | 30 | 6.0 | 1.4 x 1.6 | 0.17 |
| mDIXON | T1FFE | TRA | 400x350 | 100 | 2.5 | 1.8 x 1.9 | 0:19 |
| DYNAMIC | T1FFE | TRA | 400x350 | 125 | 2.0 | 2.0 x 2.0 | 4 x 0:18 |
| T2 TSE TE80 | TSE | TRA | 400x350 | 38 | 6.0 | 1.4 x 1.6 | 0:17 |
| T2 TFE TE250 | TFE | TRA | 400x350 | 38 | 6.0 | 1.4 x 1.6 | 2 x 00:13 |
| DWI 0-10-500-1000 | SE-EPI | TRA | 400x350 | 38 | 6.0 | 3.0 x 3.0 | 4:45 |
| DYNAMIC late | T1FFE | TRA | 400x350 | 125 | 2.0 | 2.0 x 2.0 | 0:18 |

**3T Ingenia:**

| **Name** | **Technique** | **Orientation** | **FOV** | **Slices** | **Thickness** | **Voxel size** | **Scan time** |
| --- | --- | --- | --- | --- | --- | --- | --- |
| SURVEY | T1FFE | MST |  |  |  |  | 0:15 |
| T2 TSE TE80 COR | TSE | COR | 348 | 30 | 6.0 | 1.30 x 1.62 | 2 x 0:15 |
| mDIXON | T1FFE | TRA | 349 | 131 | 1.75 | 1.59 x 1.71 | 0:19 |
| DYNAMIC | T1FFE | TRA | 349 | 131 | 1.75 | 1.75 x 1.74 | 4 x 0:15 |
| T2 TSE TE80 | TSE | TRA | 348 | 34 | 6.0 | 1.30 x 1.62 | 1:42 |
| T2 TFE TE250 | TFE | TRA | 348 | 34 | 6.0 | 1.30 x 1.60 | 1:42 |
| DWI | SE-EPI | TRA | 352 | 34 | 6.0 | 3.03 x 3.03 | 4:36 |
| DYNAMIC late | T1FFE | TRA | 349 | 131 | 1.75 | 1.75 x 1.74 | 0:15 |
